# Supplementary material for: Assessment of regional and interannual variations in tropospheric ozone in chemical reanalyses
Source: Copernicus journal article supplement (doi:10.5194/egusphere-2024-3759), 2025-01-14
Supplement: Supplementary file 1 [file egusphere-2024-3759-supplement.pdf]

## *Supplement of*

# **Assessment of regional and interannual variations in tropospheric ozone in chemical reanalyses**

Dylan B. A. Jones<sup>1</sup>, Lucas Prates<sup>1</sup>, Zhen Qu<sup>2</sup>, William Y. Y. Cheng<sup>3</sup>, Kazuyuki Miyazaki<sup>4</sup>, Takashi Sekiya<sup>5</sup>, Antje Inness<sup>6</sup>, Rajesh Kumar<sup>3</sup>, Xiao Tang<sup>7,8</sup>, Helen Worden<sup>3</sup>, Gerbrand Koren<sup>9</sup>, Vincent Huijnen<sup>10</sup>

<sup>1</sup>Department of Physics, University of Toronto, Toronto, Ontario, Canada

<sup>2</sup>Department of Marine Earth and Atmospheric Sciences, North Carolina State University, Raleigh, NC 27607, USA

<sup>3</sup>NSF National Center for Atmospheric Research, Boulder, CO, USA

<sup>4</sup>Jet Propulsion Laboratory/California Institute of Technology, Pasadena, CA, USA

<sup>5</sup>Japan Agency for Marine-Earth Science and Technology, Yokohama 2360001, Japan

<sup>6</sup>European Centre for Medium-range Weather Forecasts (ECMWF), Reading, UK

<sup>7</sup>LAPC & ICCES, Institute of Atmospheric Physics, Chinese Academy of Sciences, Beijing, 100029, China

<sup>8</sup>College of Earth and Planetary Sciences, University of Chinese Academy of Sciences, Beijing, 100049, China

<sup>9</sup>Copernicus Institute of Sustainable Development, Utrecht University, Utrecht, the Netherlands

<sup>10</sup>Royal Netherlands Meteorological Institute (KNMI), De Bilt, the Netherlands

**Contents of this file:** Figures S1-S7

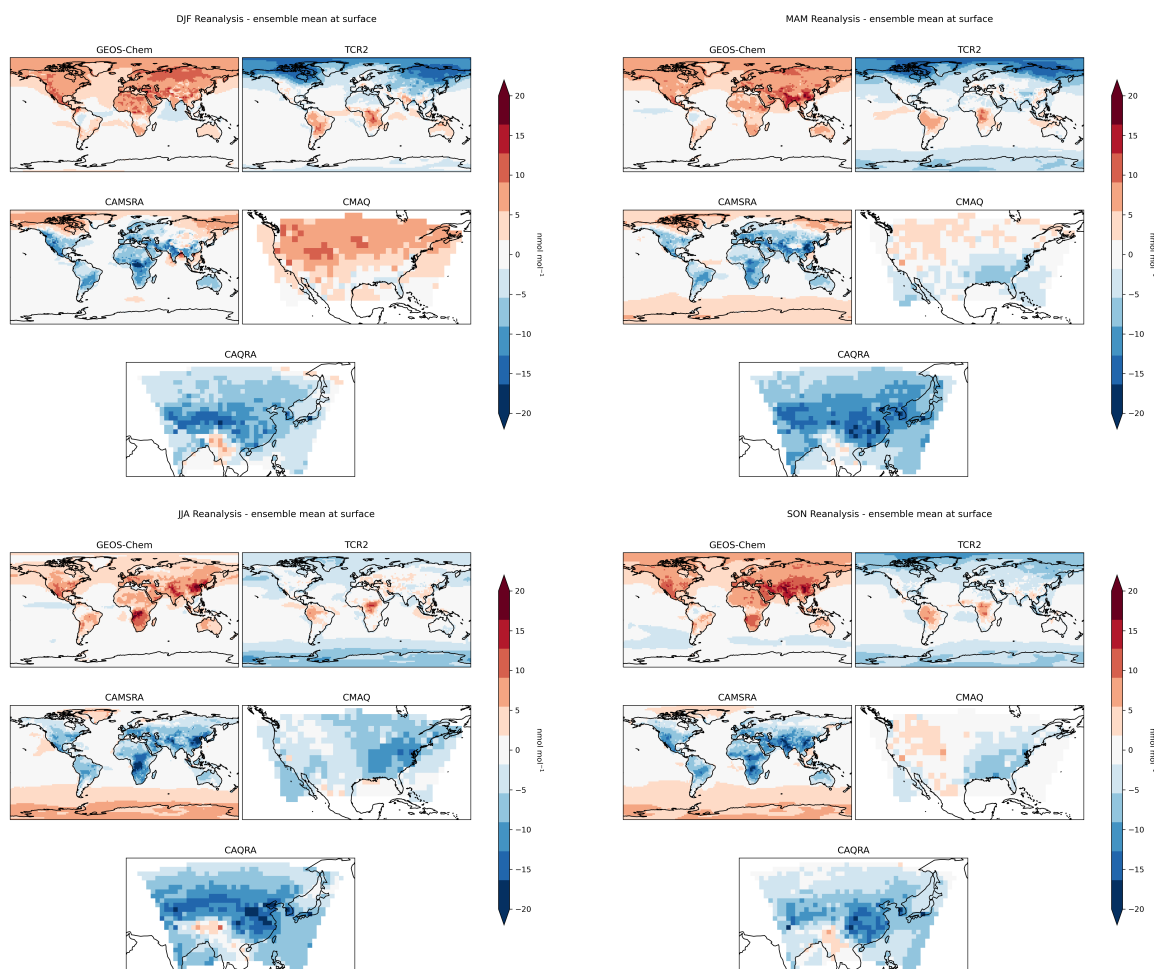

**Figure S1.** Seasonal mean differences (nmol mol<sup>-1</sup>) between ozone in the individual reanalyses and the ensemble mean at the surface.

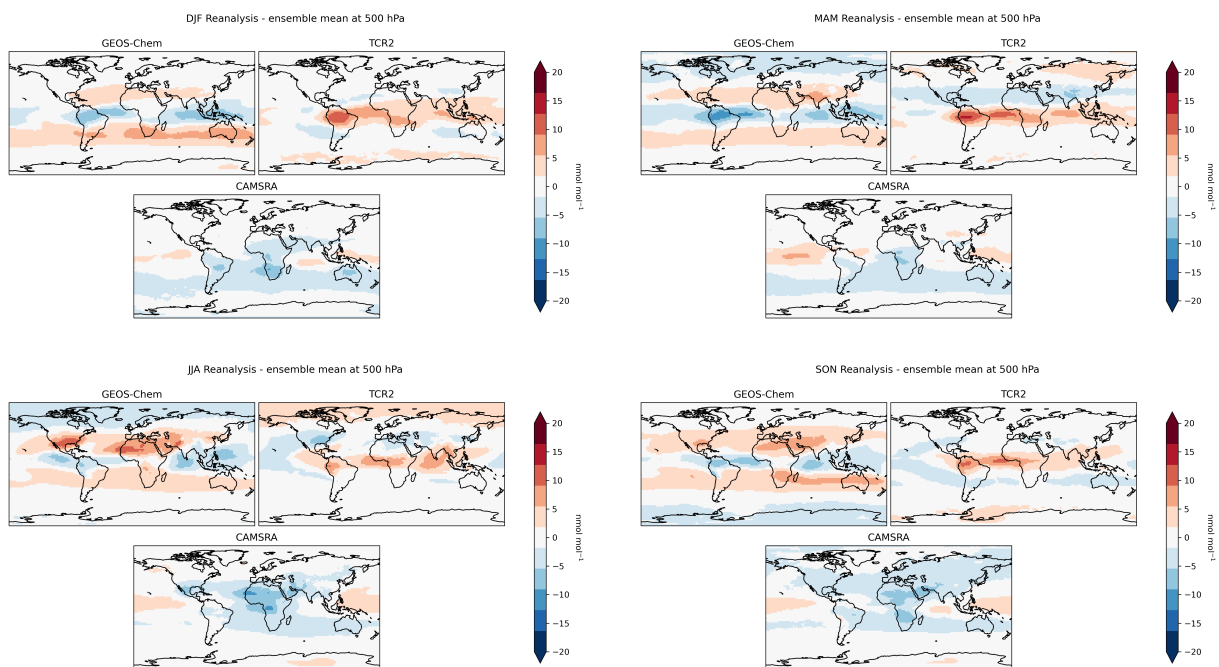

**Figure S2.** Seasonal mean differences (nmol mol<sup>-1</sup>) between ozone in the individual reanalyses and the ensemble mean at 500 hPa.

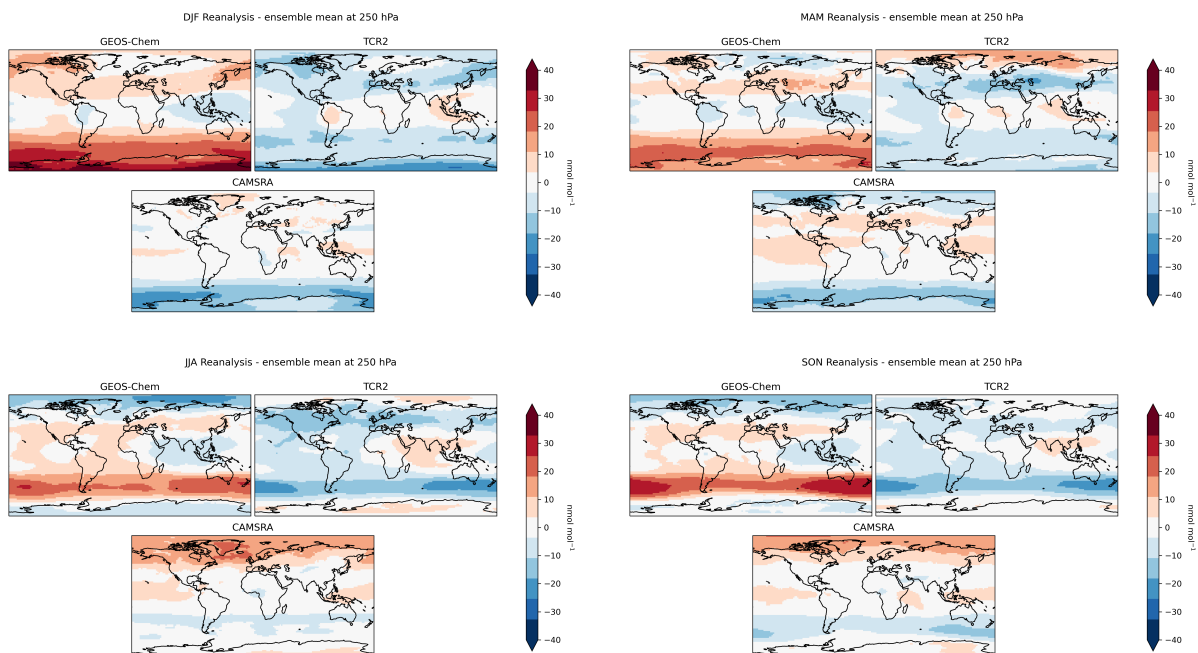

**Figure S3.** Seasonal mean differences (nmol mol<sup>-1</sup>) between ozone in the individual reanalyses and the ensemble mean at 250 hPa.

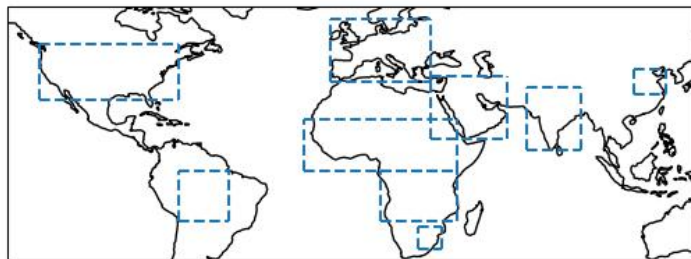

**Figure S4.** Regional domains used in the regional evaluation. The boundaries of the regions are given in Table 1.

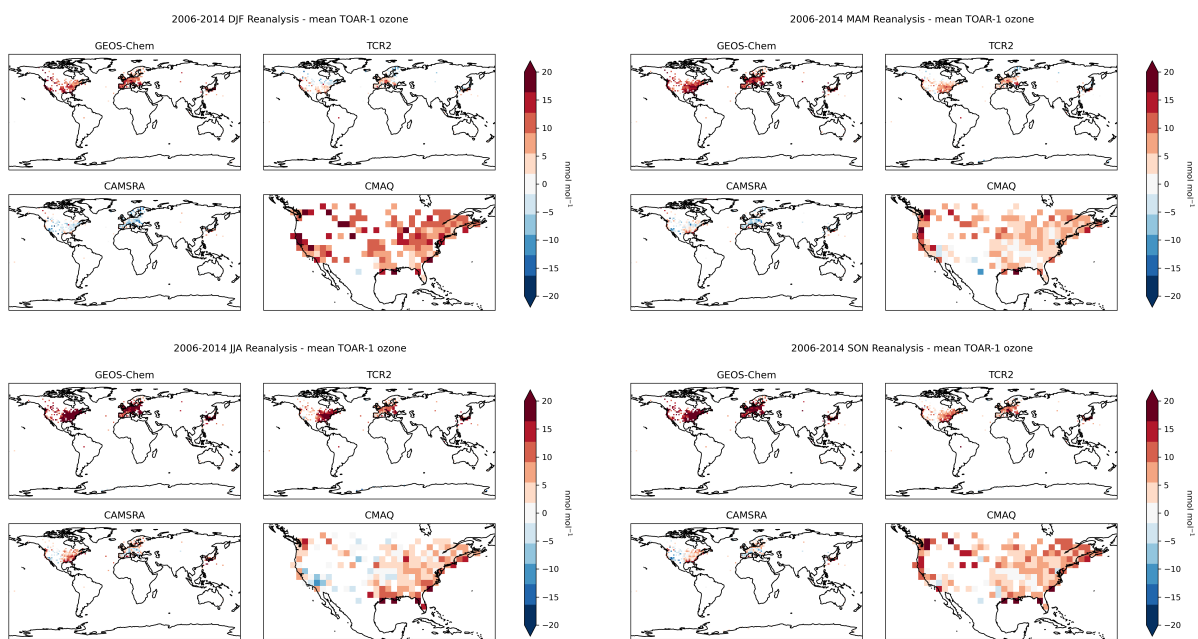

**Figure S5.** Seasonal mean bias ( $\text{nmol mol}^{-1}$ ) between ozone in the individual reanalyses and the TOAR-I ozone observations (2006–2014) at the surface. The TOAR-I observations and the reanalyses were regridded onto a  $2^\circ \times 2^\circ$  grid and only rural observations were used in the comparison.

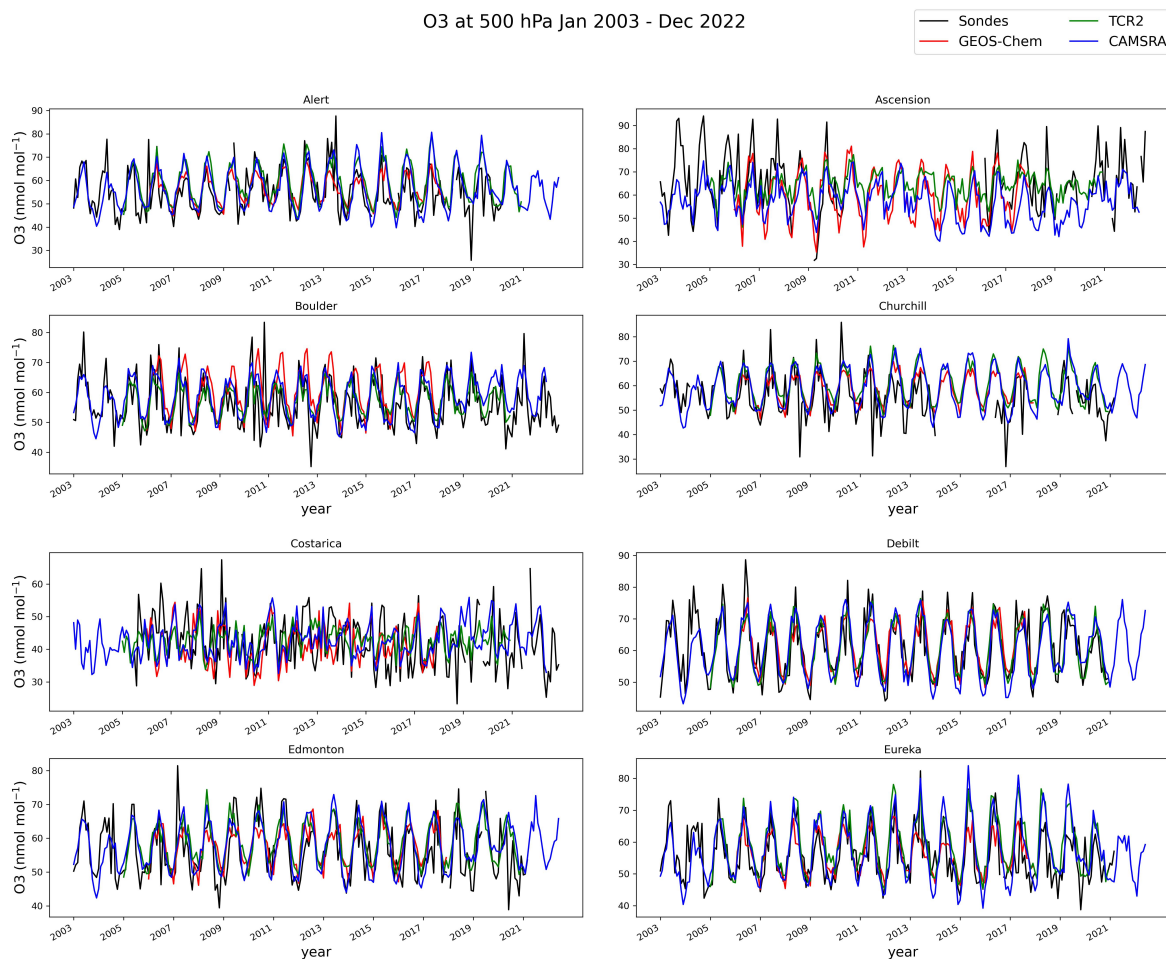

**Figure S6.** Time series (2003–2022) of ozone in the reanalyses and ozonesonde observations at 500 hPa at individual ozonesonde sites. The ozonesonde data are in black, GEOS-Chem is in red, TCR-2 is in green, and CAMSRA is in blue. The regional reanalyses are not show since only surface fields were available from the regional reanalyses.

O<sub>3</sub> at 500 hPa Jan 2003 - Dec 2022

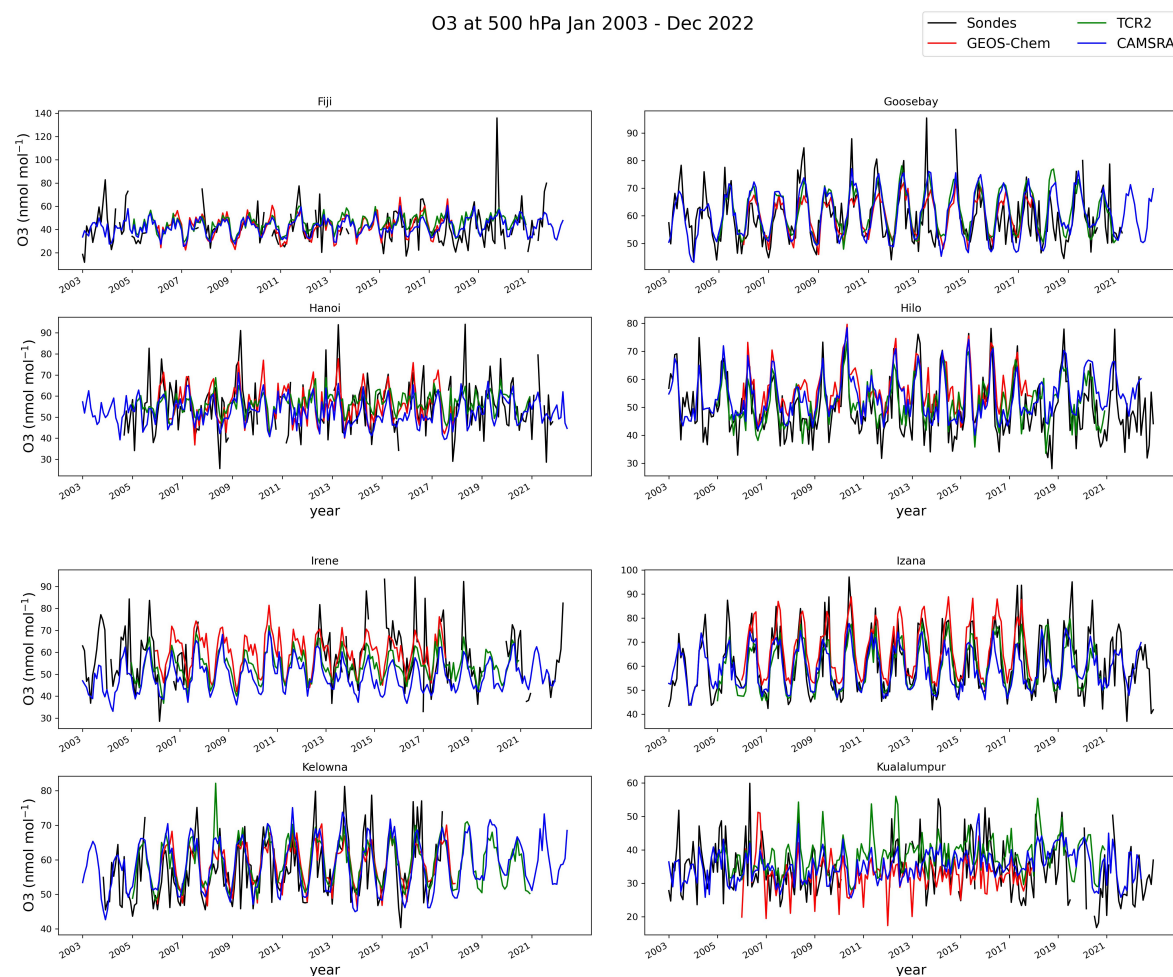

Figure S6. Continued.

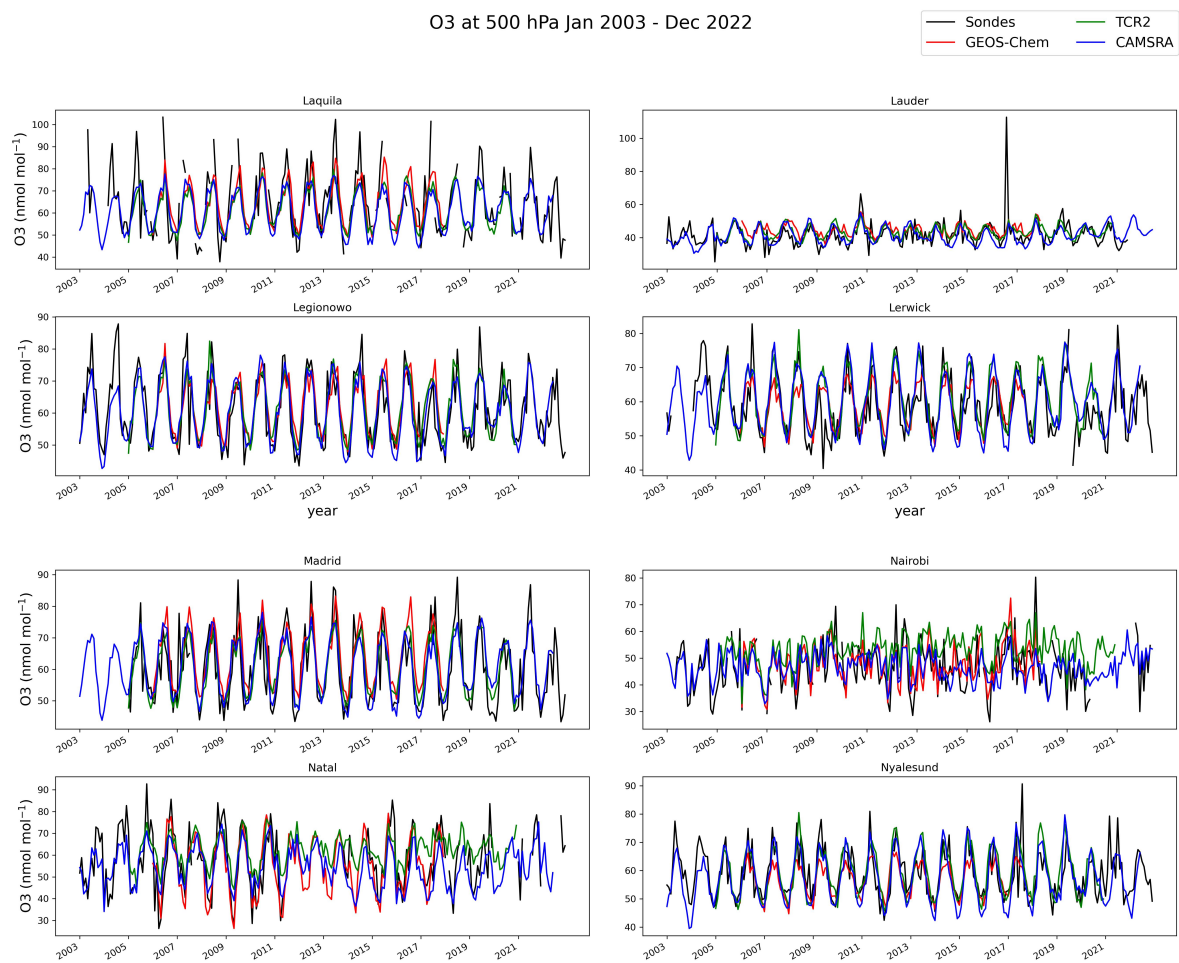

**Figure S6.** Continued.

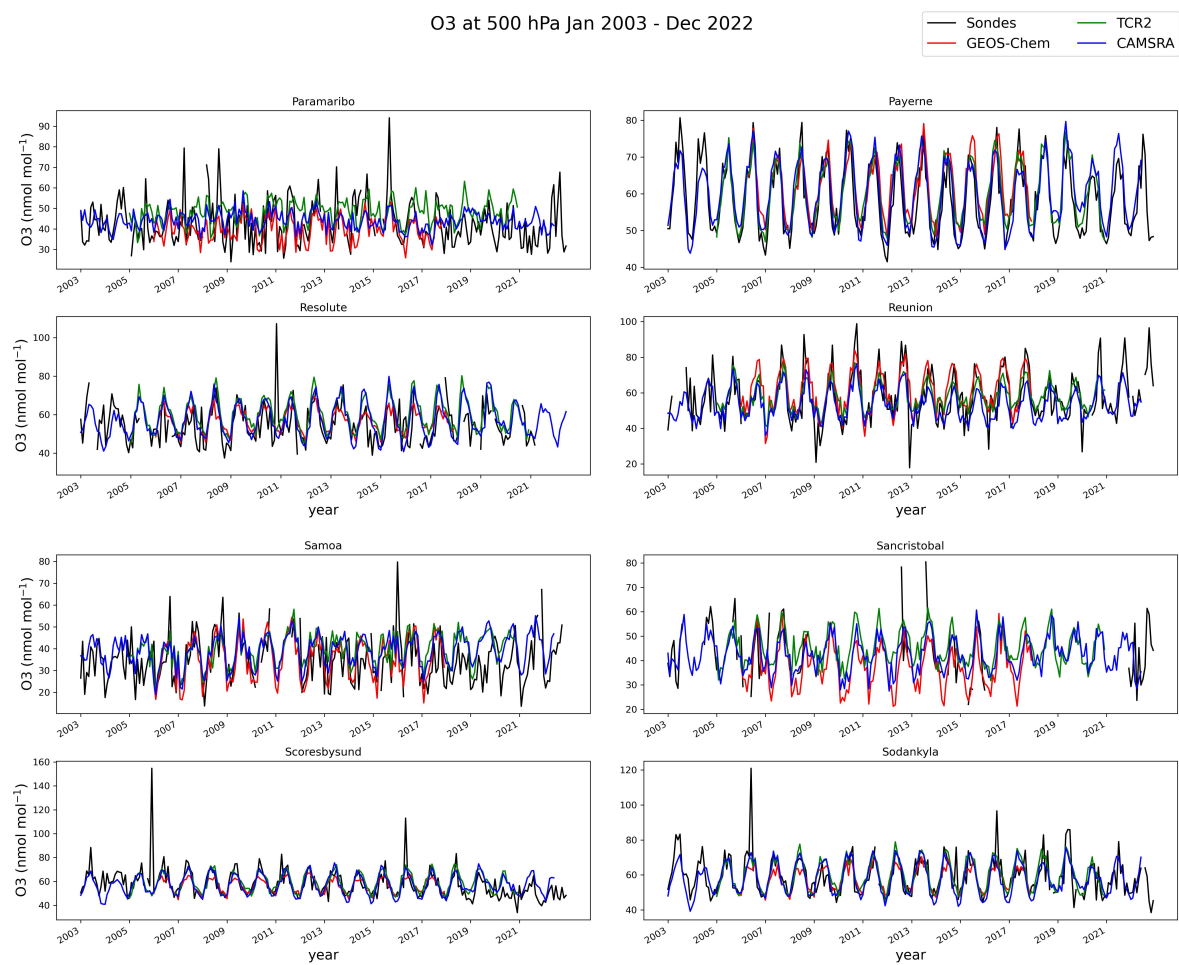

**Figure S6.** Continued.

O<sub>3</sub> at 500 hPa Jan 2003 - Dec 2022

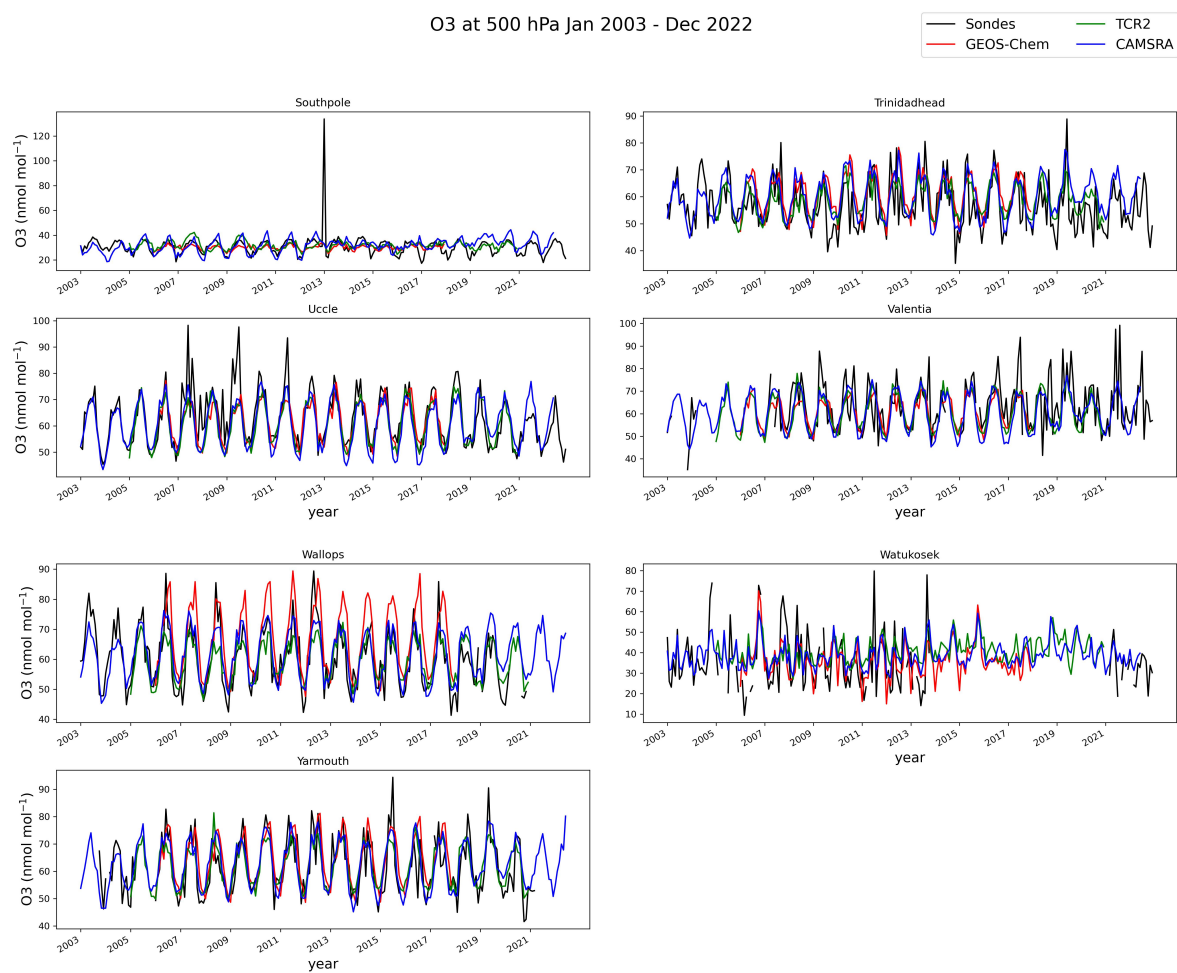

**Figure S6.** Continued.

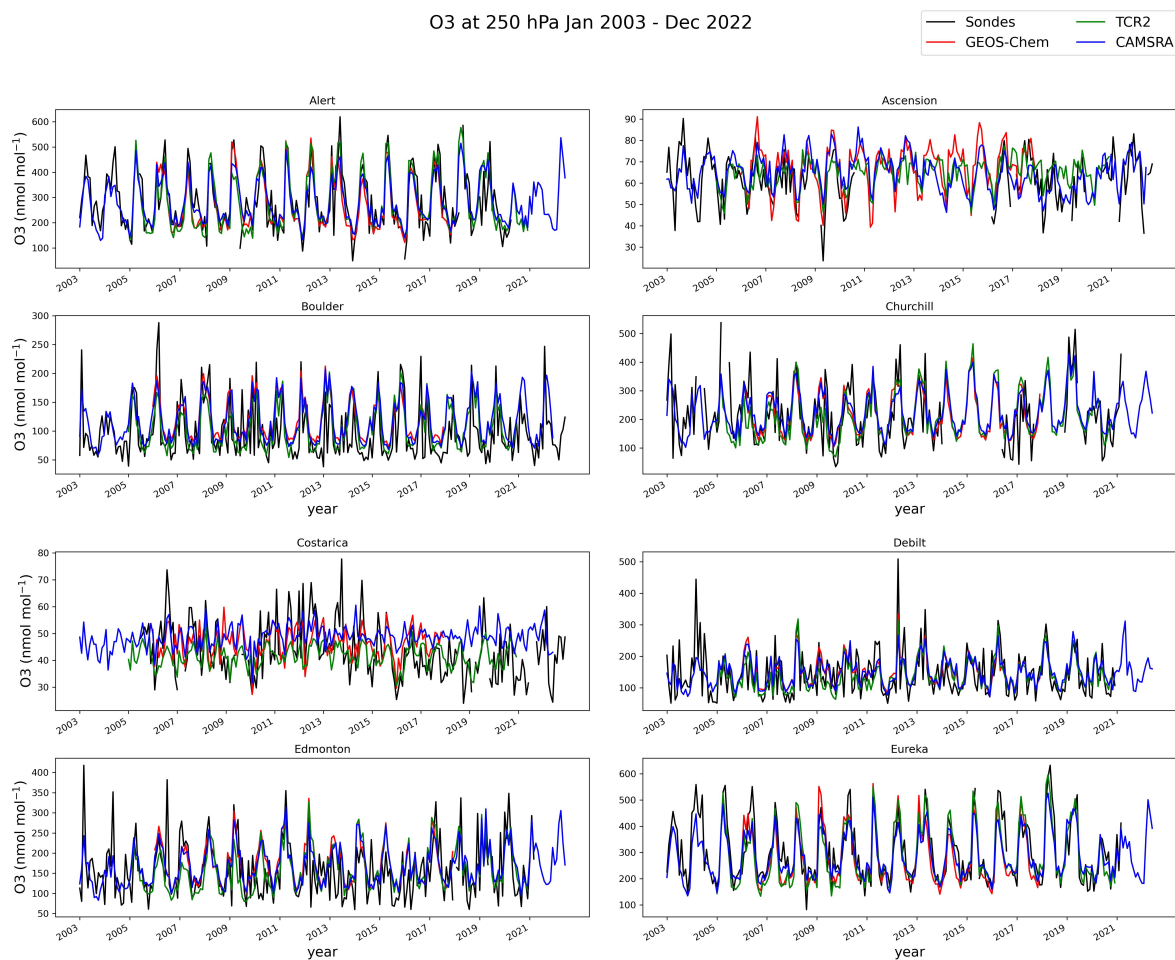

**Figure S7.** Time series (2003–2022) of ozone in the reanalyses and ozonesonde observations at 250 hPa at individual ozonesonde sites. The ozonesonde data are in black, GEOS-Chem is in red, TCR-2 is in green, and CAMSRA is in blue. The regional reanalyses are not shown since only surface fields were available from the regional reanalyses.

O<sub>3</sub> at 250 hPa Jan 2003 - Dec 2022

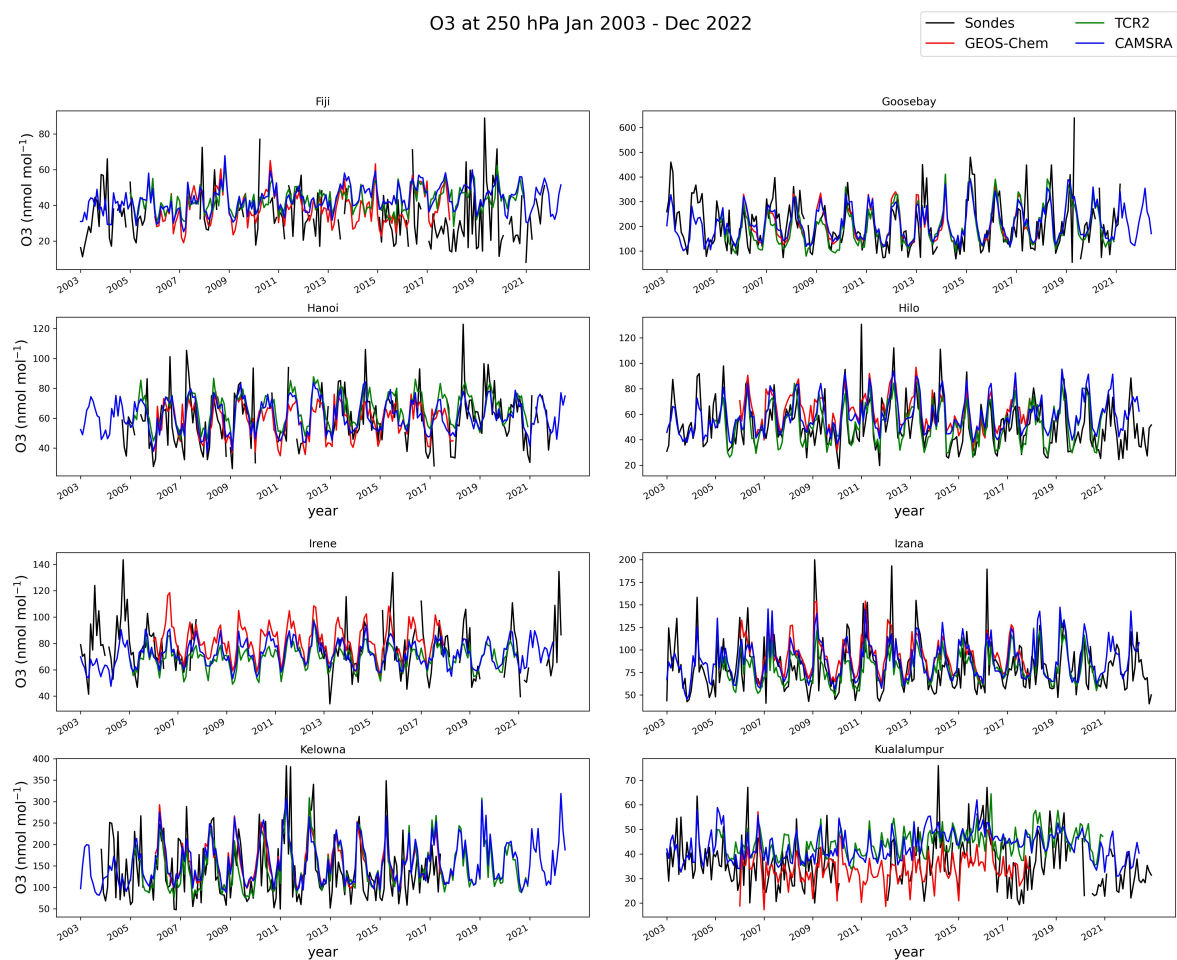

**Figure S7.** Continued.

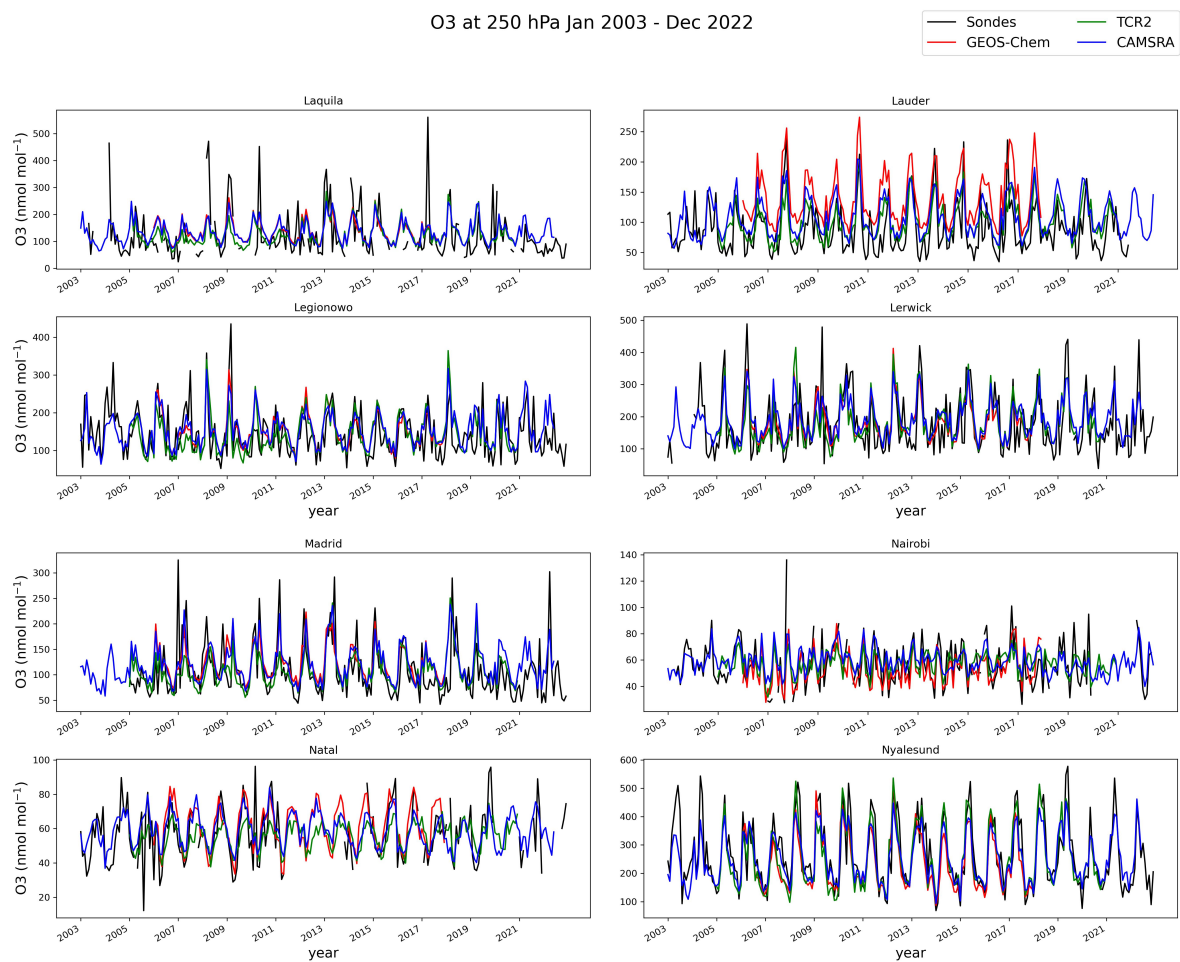

**Figure S7.** Continued.

O3 at 250 hPa Jan 2003 - Dec 2022

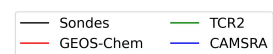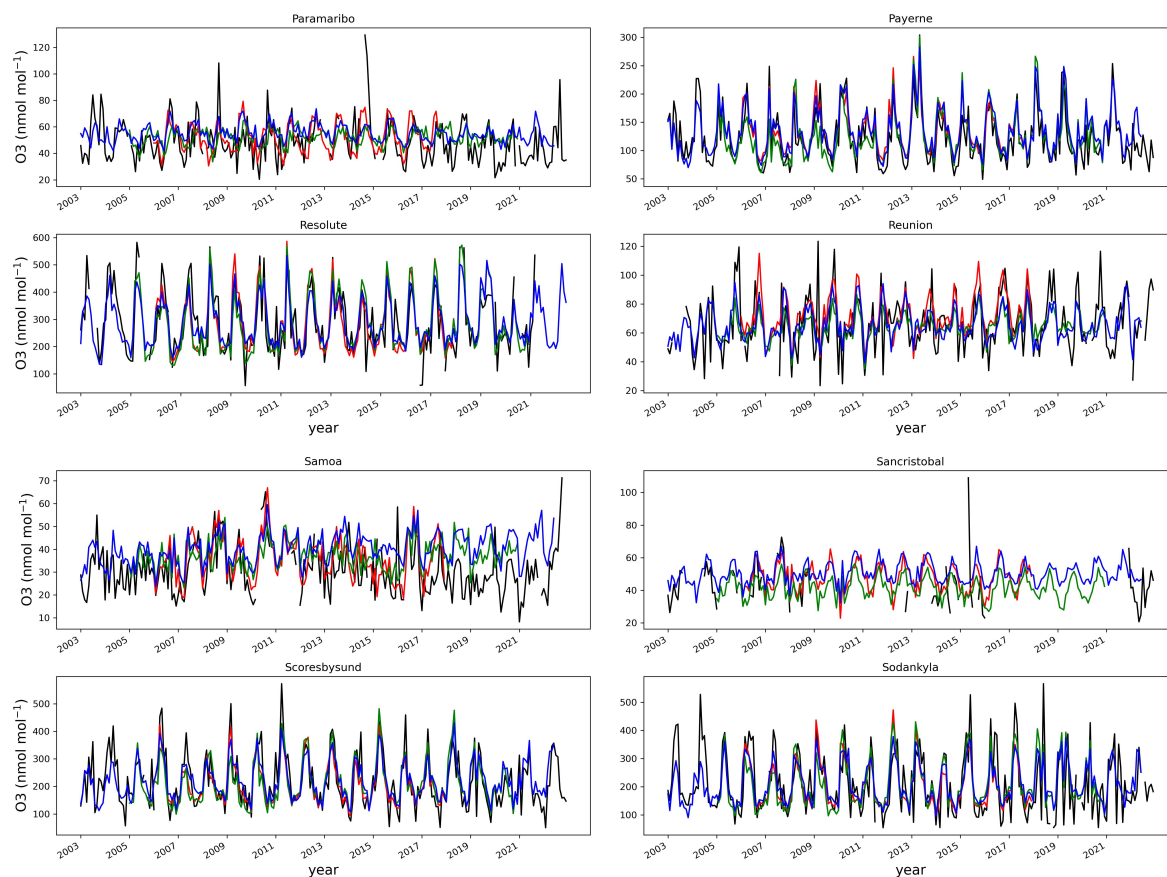

**Figure S7.** Continued.

O<sub>3</sub> at 250 hPa Jan 2003 - Dec 2022

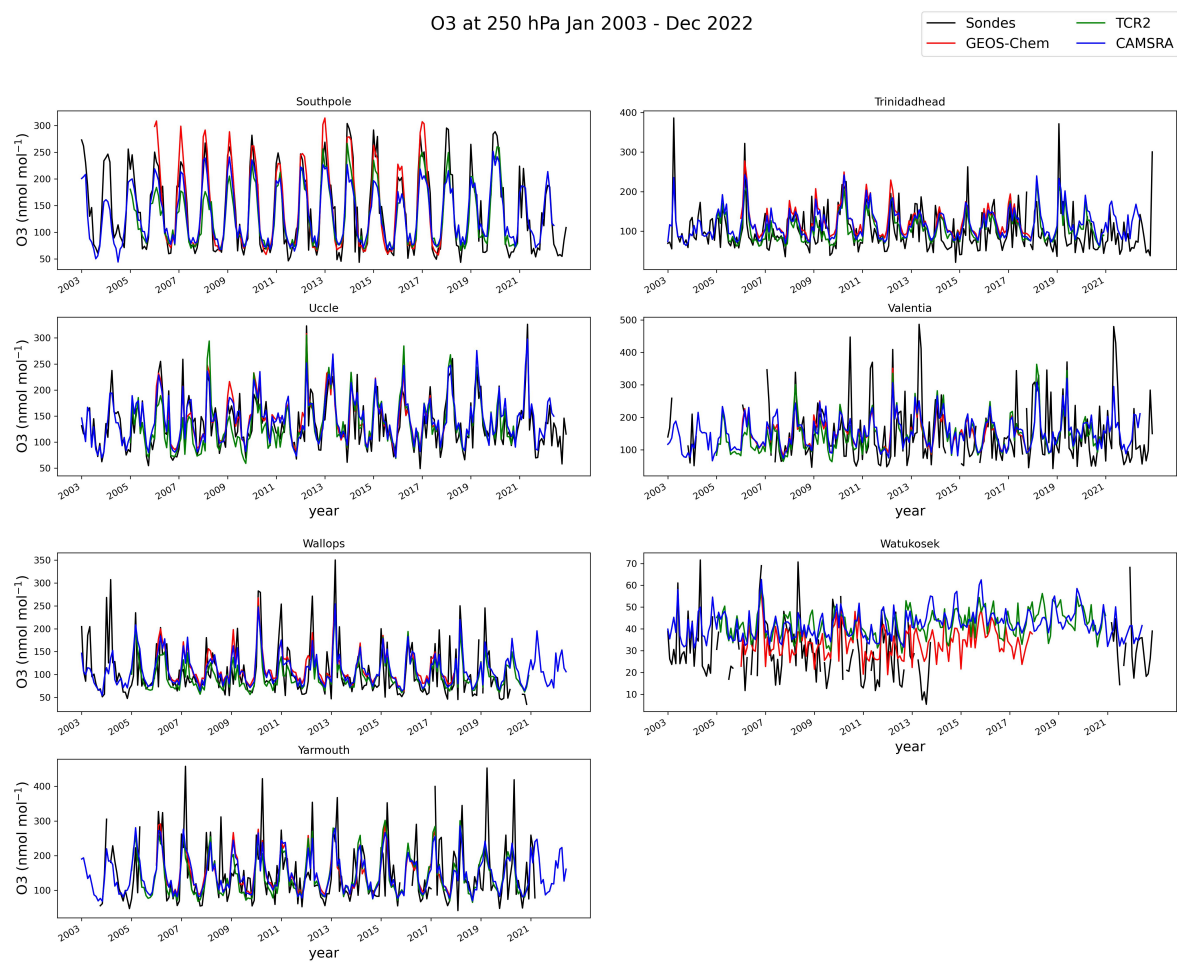

**Figure S7.** Continued.
